# Supplementary figures and images for: Structural dynamics determine voltage and pH gating in human voltage-gated proton channel
Source: eLife journal article supplement (doi:10.7554/elife.73093), 2022-03-04

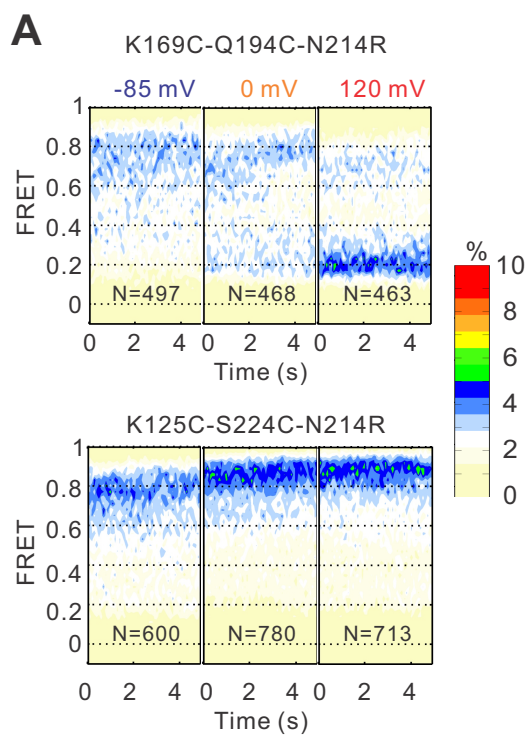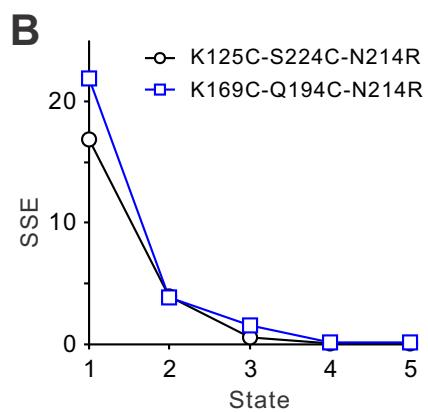

Supplement: supp [file elife-73093-supp-v1.zip]

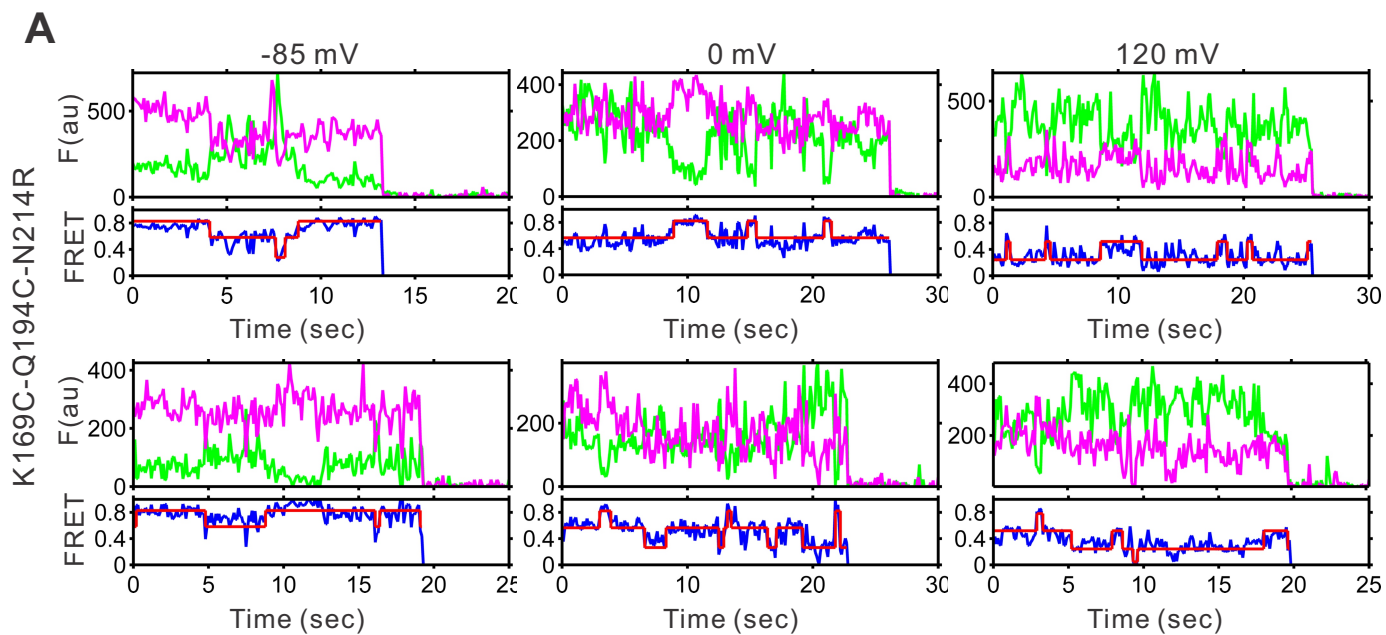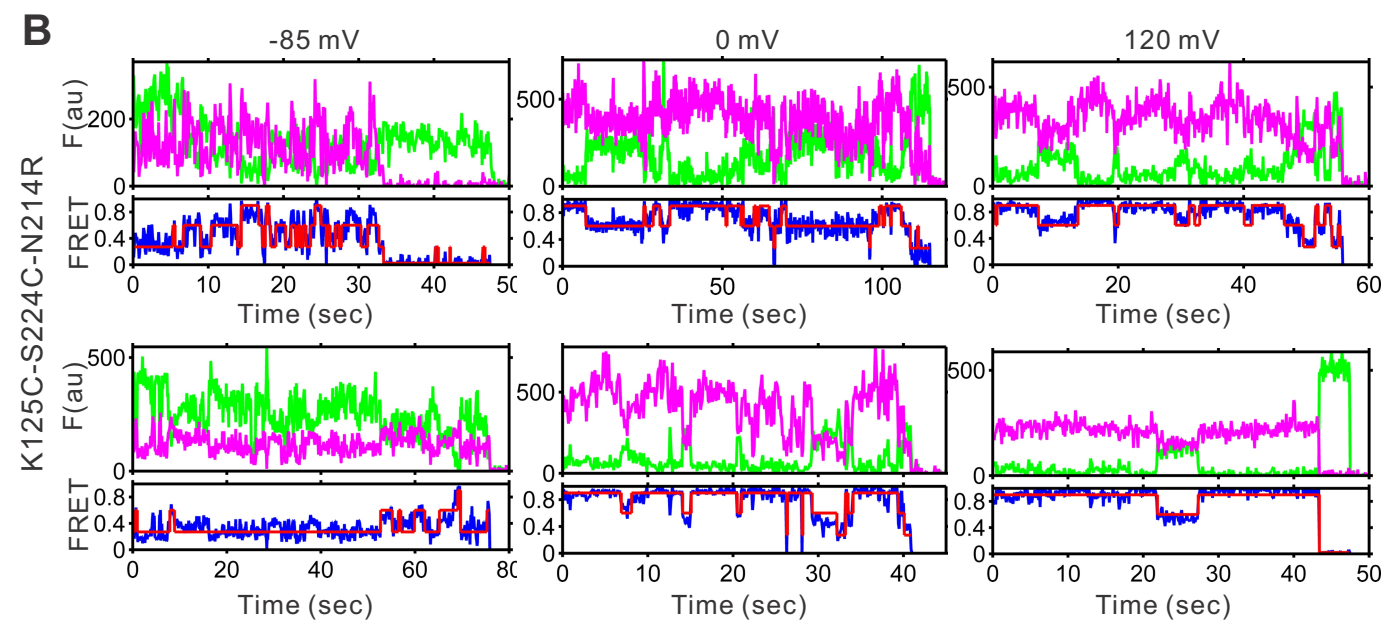

Supplement: supp [file elife-73093-supp-v1.zip]

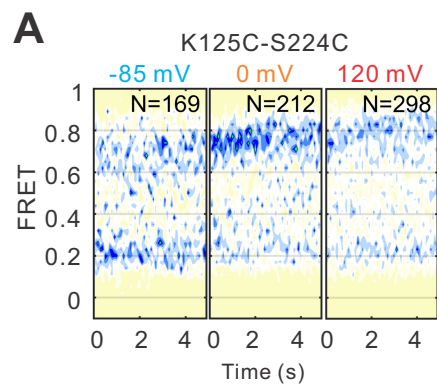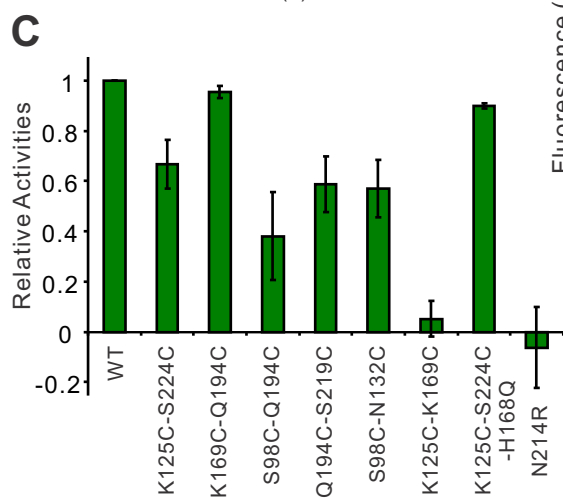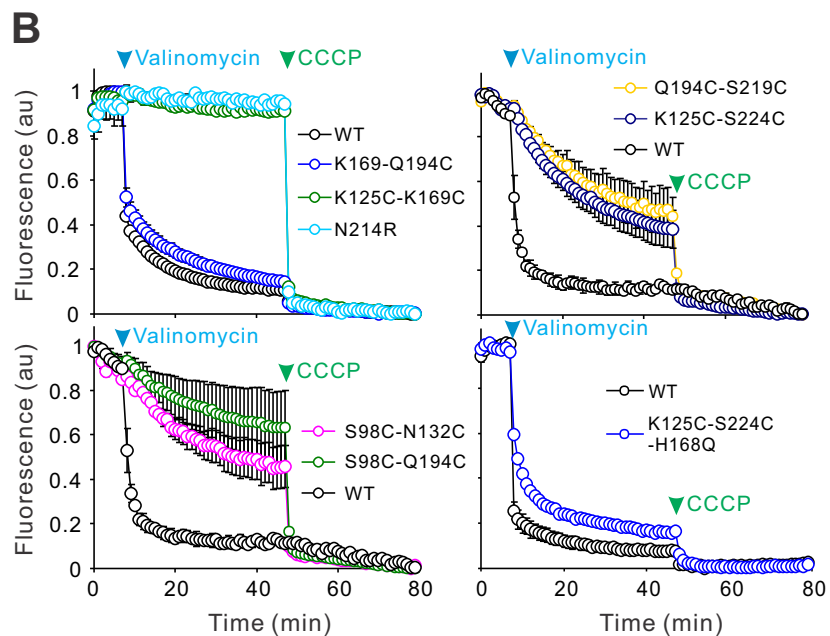

Supplement: supp [file elife-73093-supp-v1.zip]

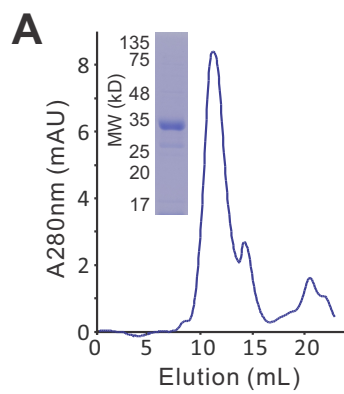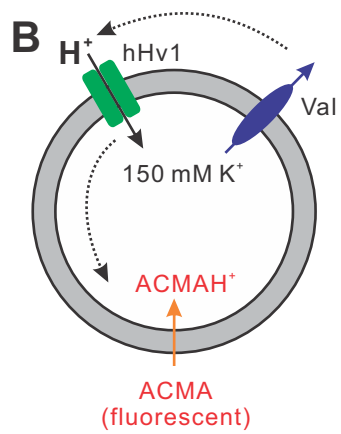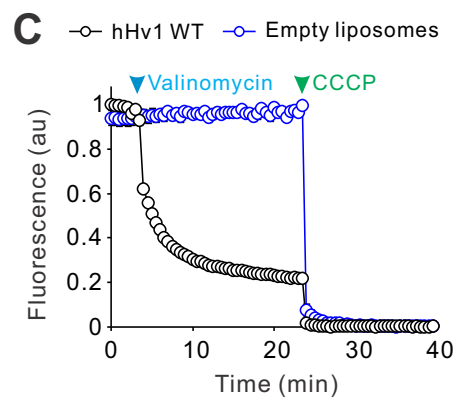

Supplement: supp [file elife-73093-supp-v1.zip]
